# Supplementary material for: An advanced asymmetric supercapacitor based on a novel ternary graphene/nickel/nickel oxide and porous carbon electrode with superior electrochemical performance
Source: Royal Society of Chemistry journal article supplement (doi:10.1039/c5ra18976d), 2015-01-01
Supplement: c5ra18976d1.pdf [file c5ra18976d1.pdf]

**An Advanced Asymmetric Supercapacitor Based on a Novel Ternary Graphene/Nickel/Nickel Oxide and Porous Carbon Electrodes with Superior Electrochemical Performance**

*Miaomiao Liu, Jie Chang, Yang Bai, Jing Sun\**

*The State Key Lab of High Performance Ceramics and Superfine Microstructure,  
Shanghai Institute of Ceramics, Chinese Academy of Sciences, 1295 Ding Xi Road,  
Shanghai 200050, China*

*E-mail address: jingsun@mail.sic.ac.cn (J. Sun)*

*Tel: +86-12-52414301. Fax: +86-21-52413122*

## Electronic Supplementary Information (ESI)

### Supplementary Graphics

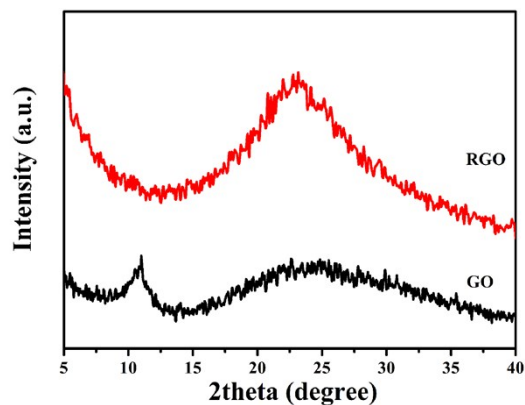

Fig. S1 XRD patterns of RGO and GO.

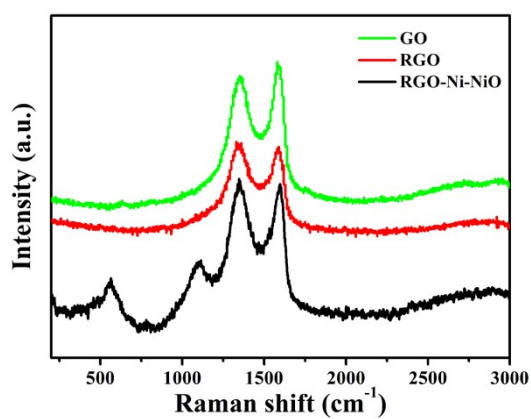

Fig. S2 Raman spectra patterns of GO, RGO and RGO/Ni/NiO.

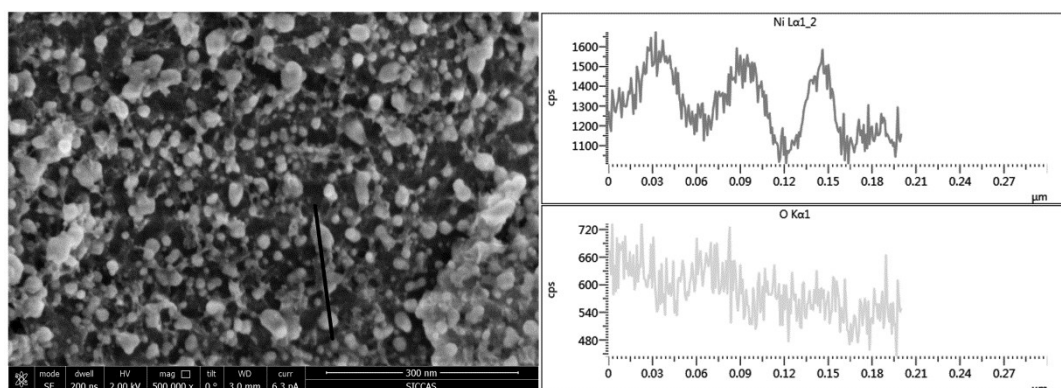

Fig. S3 Line scanning images of RGO/Ni/NiO.

This journal is (c) The Royal Society of Chemistry 2015

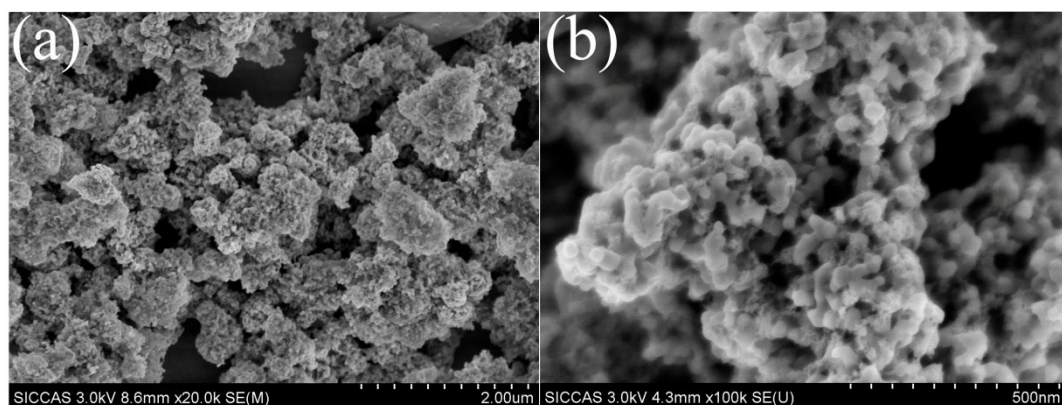

Fig. S4 SEM images of Ni/NiO.

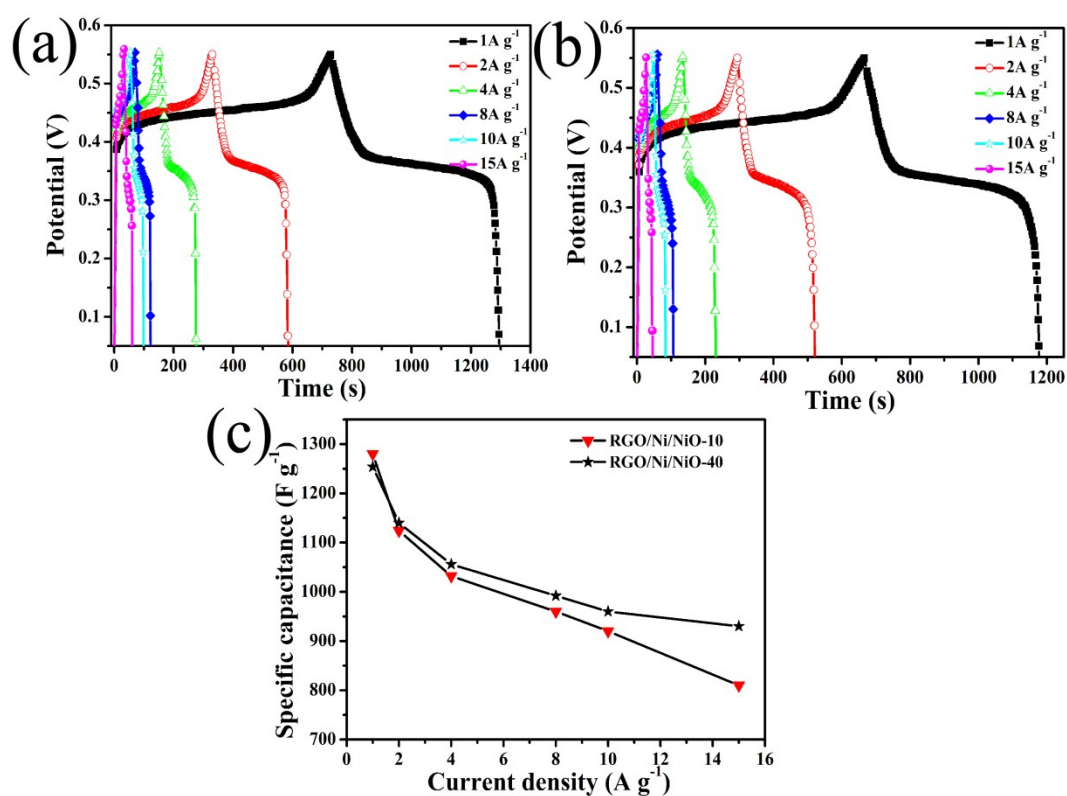

Fig. S5 Galvanostatic charge/discharge curves of (a) RGO/Ni/NiO-10 (b) RGO/Ni/NiO-40 at

different current densities. (c) Average specific capacitance at different current densities.

This journal is (c) The Royal Society of Chemistry 2015

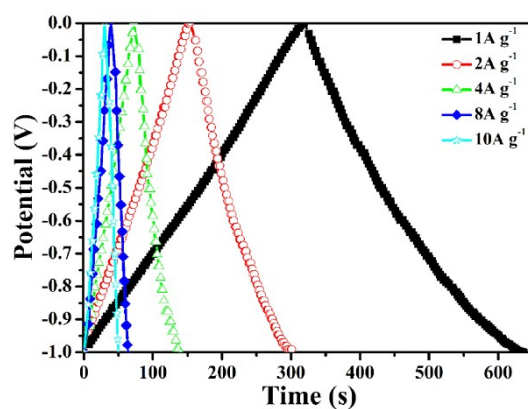

Fig. S6 Galvanostatic charge/discharge curves of PC at different current densities.

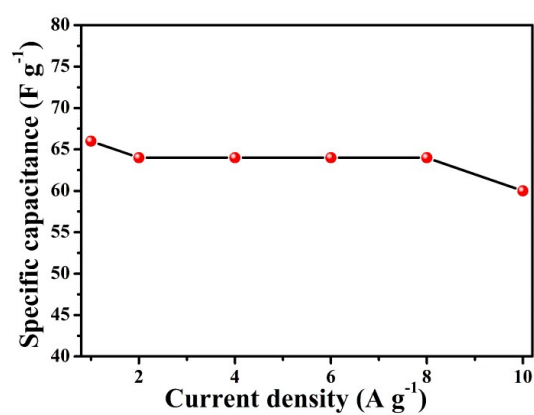

Fig. S7 Specific capacitance of PC//PC symmetry capacitor within a voltage window of 1 V at different current densities.
